# Supplementary material
Source: PubMed Central journal article supplement (PMC2798331)
Supplement: tpc.109.068825_1.pdf [file tpc.109.068825_1.pdf]

Supplemental Data. Corellou et al. (2009). Clocks in the green lineage: Comparative functional analysis of the circadian architecture of the picoeukaryote *Ostreococcus*. Plant Cell. 10.1105/tpc.109.068825

## Supplemental Figure 1

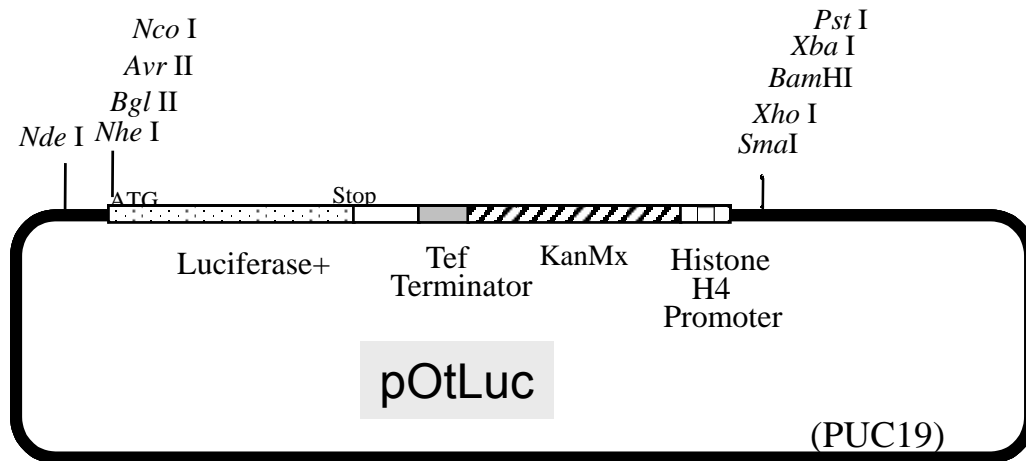

**Supplemental Figure 1. pOtLuc expression vector designed to generate promoter or full gene luciferase fusion in *Ostreococcus*.** Schematic map of the pOtLuc vector used to introduce *Ostreococcus* sequences fused to luciferase. The KanMx resistance gene was used to select stable transformants (resistance to G418).

## Supplemental Figure 2

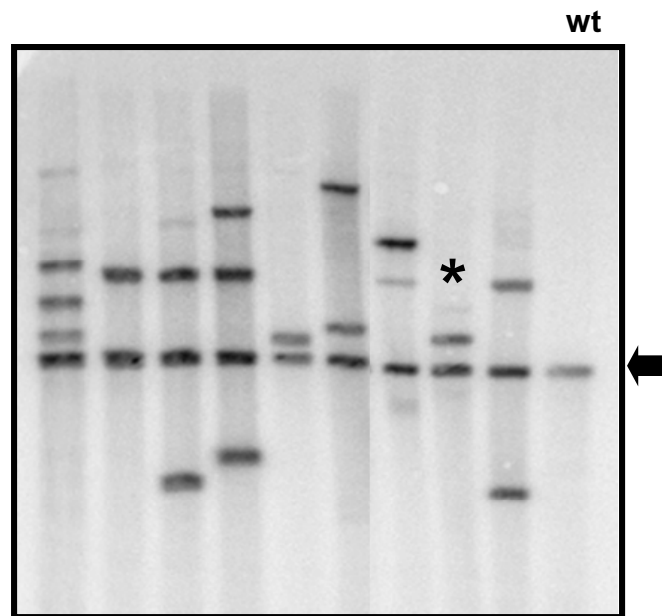

**Supplemental Figure 2. Analysis of TOC1:Luc transformants by Southern blot analysis.** Linearised DNA from a pOtluc vector containing the full *TOC1* gene fused in frame to luciferase was introduced by electroporation to *Ostreococcus*. DNA from stable transformants, resistant to G418, was digested with *Apal* (single restriction site in the *TOC1* gene at 1.4 kb from the promoter), and hybridized to *Ostreococcus TOC1*. The endogenous *TOC1* gene copy present in untransformed cells (wild type wt) is indicated by the black arrow and the single inserted copy of *TOC1* in the TOC1:Luc-8 line reference line is indicated by a star. Note, at most three insertions with an average of 1.5 copy per line. All transformants contained the full TOC1:Luc sequence as confirmed by PCR with flanking primers.

## Supplemental Figure 3

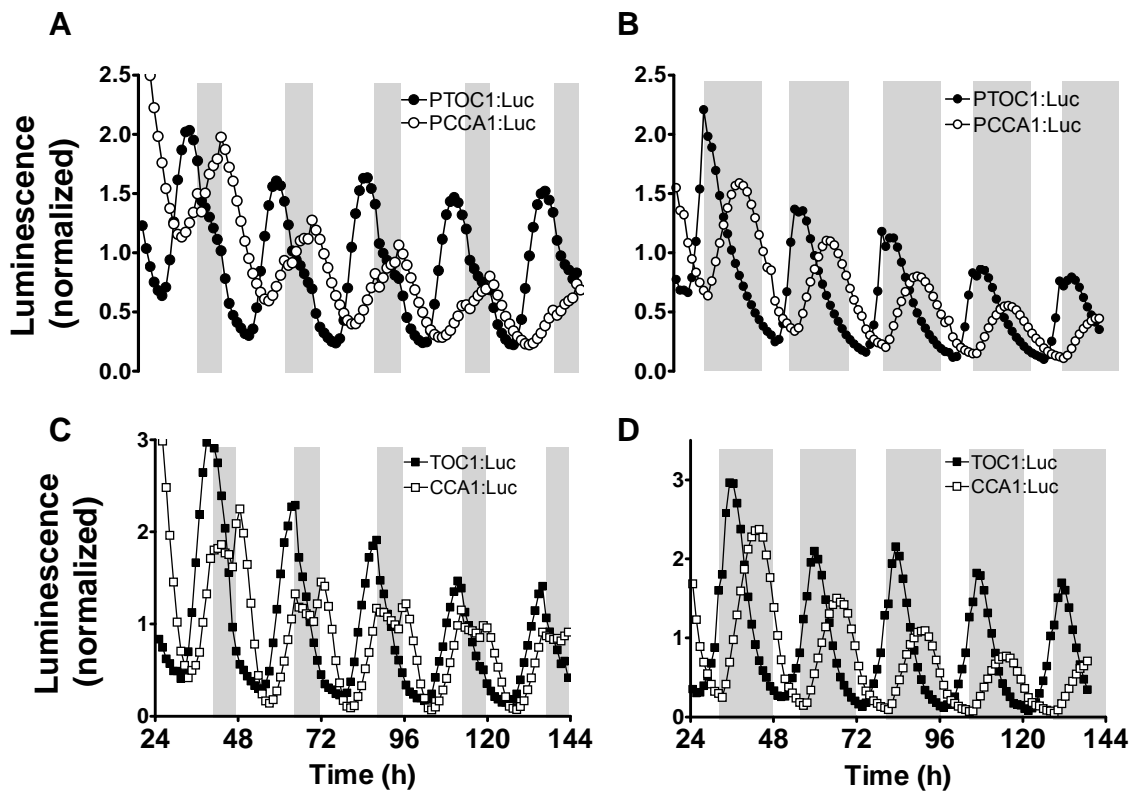

**Supplemental Figure 3. Relative phase adjustments of *TOC1* and *CCA1* promoter activity and protein synthesis to photoperiod.** Night is represented by plain grey areas. Bioluminescence of representative lines carrying *TOC1* and *CCA1* transcriptional (promoter fused to luciferase) or translational (full gene fused to luciferase) fusions. Means of triplicates (SEM smaller than symbols) of representative transcriptional and translational fusions are shown under LgD (LD: 16,8) (A,C) and ShD (LD: 8,16) (C,D).

## Supplemental Figure 4

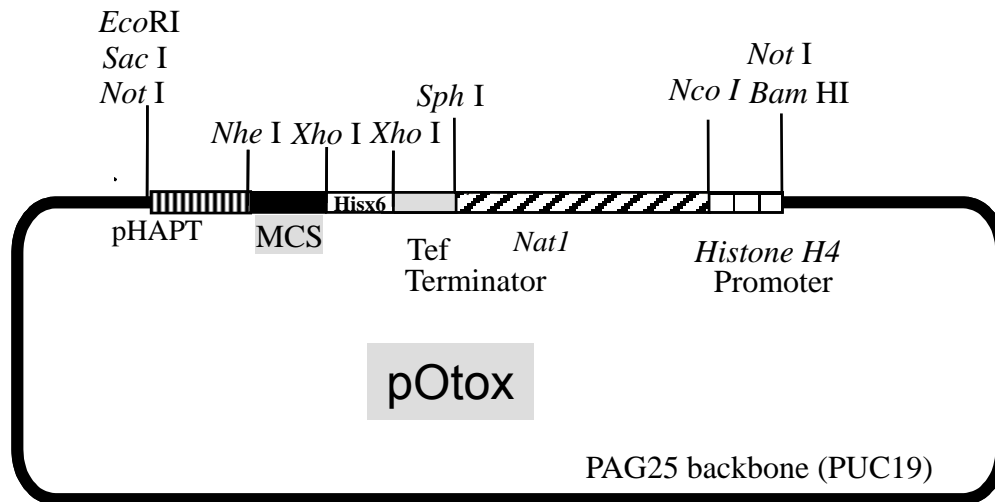

### pOtox MCS:

|                                                                                           |               |               |                 |              |     |     |     |     |     |     |              |
|-------------------------------------------------------------------------------------------|---------------|---------------|-----------------|--------------|-----|-----|-----|-----|-----|-----|--------------|
| <i>PspOM</i> I                                                                            | <i>SnaB</i> I | <i>Avr</i> II | <i>Hind</i> III | <i>Xho</i> I | His | His | His | His | His | His | <i>Xho</i> I |
| ▼                                                                                         | ▼             | ▼             | ▼               | ▼            |     |     |     |     |     |     | ▼            |
| CG GGC CCT TAC GTA CCT AGG AAG CTT CTC GAG CAC CAC CAC CAC CAC CAC TGA CTC GAG <b>TGA</b> |               |               |                 |              |     |     |     |     |     |     |              |
| GC CCG GGA ATG CAT GGA TCC TTC GAA GAG CTC GTG GTG GTG GTG GTG GTG ACT GAG CTC ACT        |               |               |                 |              |     |     |     |     |     |     |              |

**Supplemental Figure 4. Schematic map of the overexpression/antisense pOtox vector.** Overexpression or knock-down of the gene of interest is achieved by expressing the sequence of interest in sense or antisense orientation under control of the strong High Affinity Phosphate Transporter (HAPT) promoter

## Supplemental Figure 5

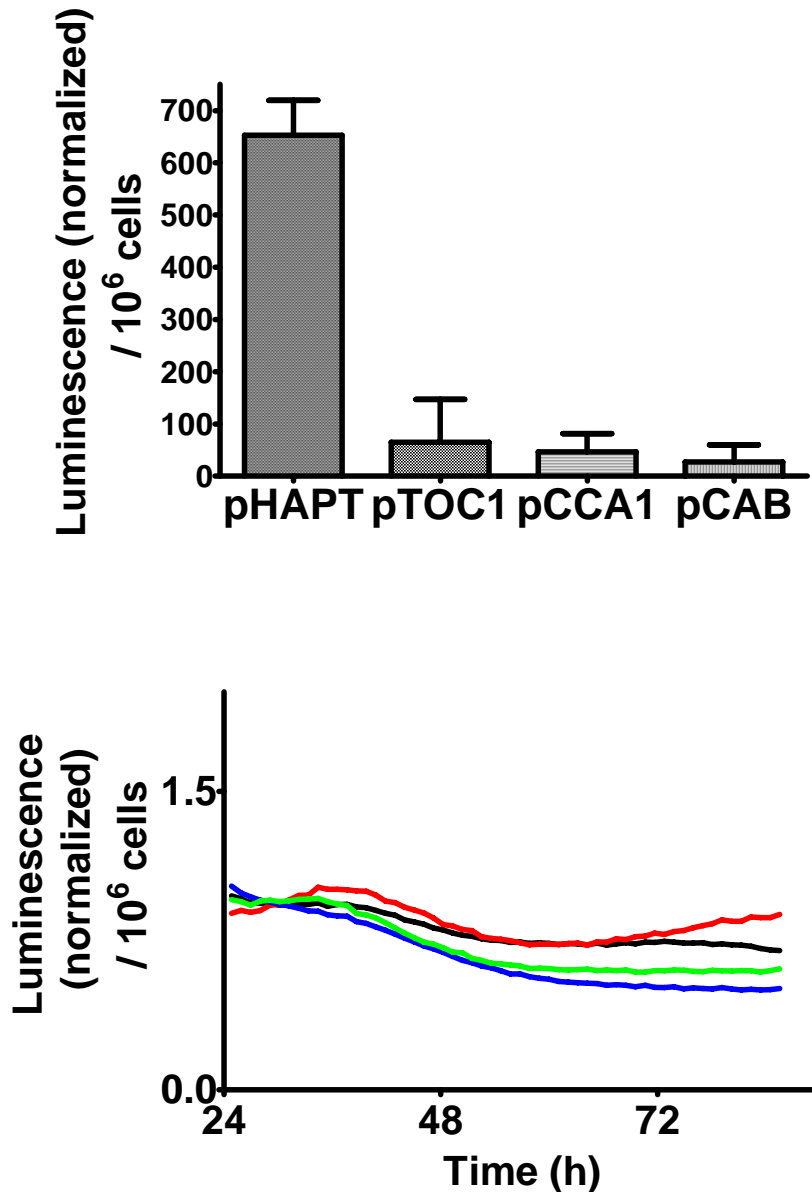

**Supplemental Figure 5. Analysis of the promoter activity of the high affinity phosphate transporter (PHAPT).** **A**, Relative strength of PHAPT (n=11), PTOC1 (n=7), PCCA1 (n=6) and PCAB (n=6) promoters. Luciferase transcriptional fusions were plated at the same density and luminescence was recorded under LL. Luminescence values over the last four hours were averaged for each line. Mean luminescence values/ $10^6$  cells ( $\pm$ SD). **B**, Luminescence profiles of four representative PHAPT:Luc lines under constant light. Cells were submitted to six hours of darkness and released into constant light. The luminescence signal is shown from 24 hours after lights on.

## Supplemental Figure 6

### TOC1-ox and CCA1-ox/as lines in the TOC1:Luc Background

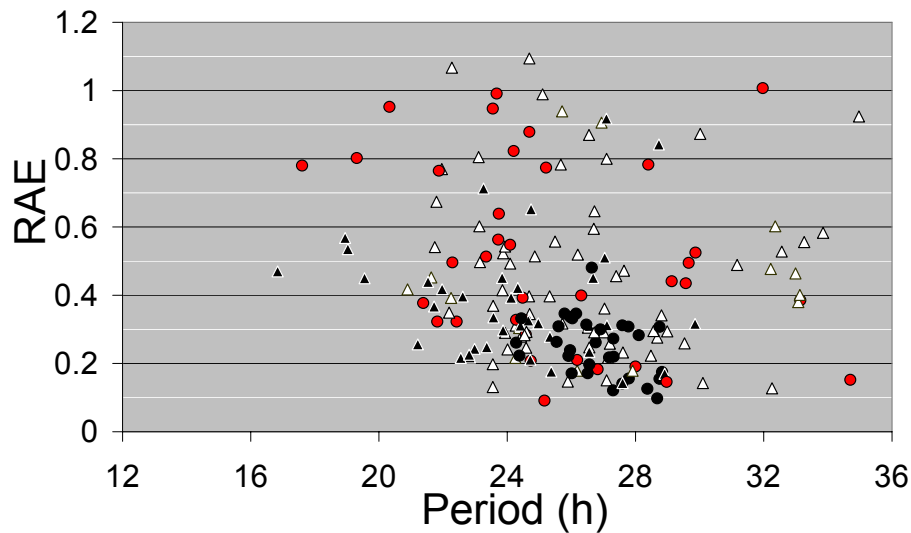

### CCA1-ox and TOC1-ox/as lines in the CCA1:Luc Background

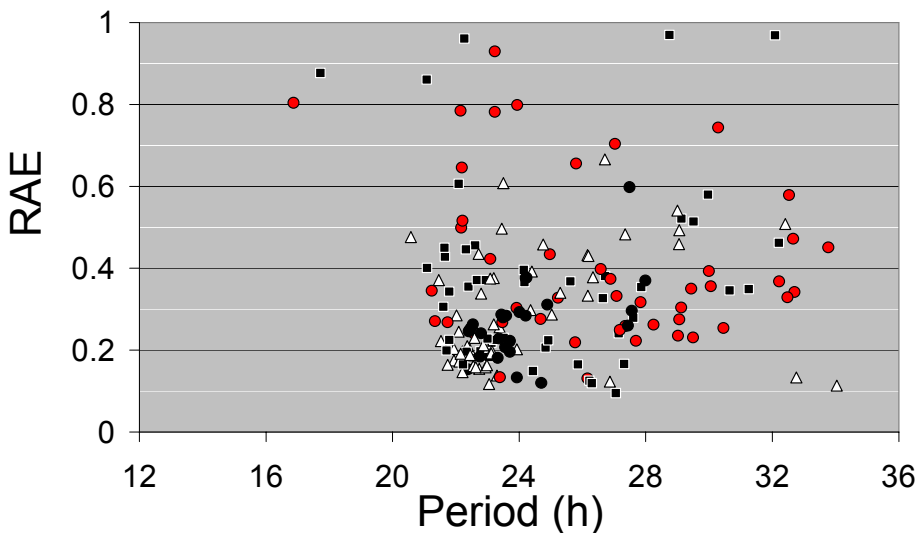

**Supplemental Figure 6. Screening for altered rhythmicity in *TOC1* and *CCA1* overexpression/antisense lines in the *CCA1*:Luc and *TOC1*:Luc background.** Lines were screened for alterations of rhythmicity in reporter genes as judged by observation of bioluminescence traces under constant light after release from LD: 12,12 entrainment. To assess observations relative amplitude error estimation was further performed over at least 3 days recording (excluding noisy traces) using FFT-NLLS. Graphs represent all single RAE values from all screening. Screens were performed several times so that defective cell lines could be plotted more than once. Period variation may be attributable to differences of cell concentration and should not be considered. For the great majority of the lines judged as arrhythmic, no period could be estimated (so no RAE) and the data are not plotted. A good correlation was found between severely altered patterns of oscillation and RAEs above 0.5. A line was therefore considered as arrhythmic if the estimated RAE was consistently above 0.5, dampened rhythmic if the estimated RAE was consistently above 0.3 and rhythmic otherwise, from at least three biological triplicates in each experiment. Black circle: Control lines. Red circle: *TOC1*-ox lines. White triangle: *CCA1*-ox lines. Black square: *TOC1*-as lines. Black triangle: *CCA1*-as lines.

## Supplemental Figure 7

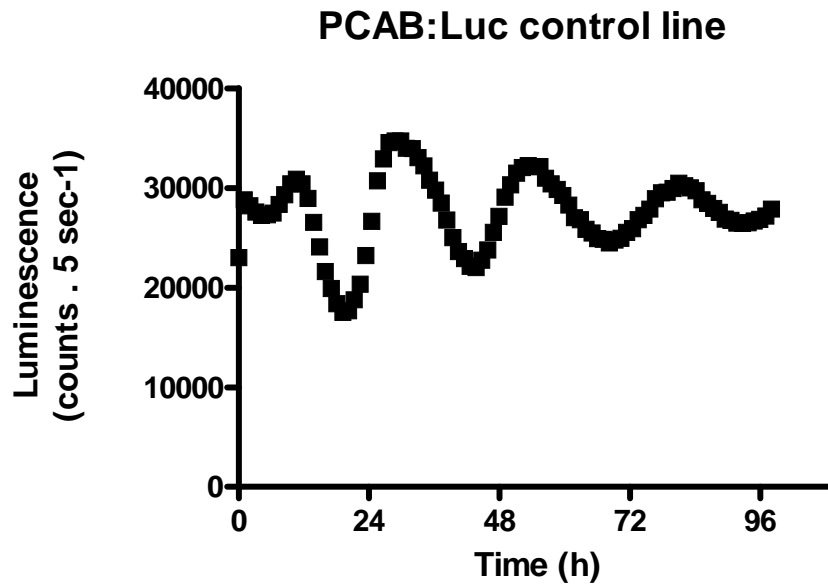

**Supplemental Figure 7.** Luminescence recording of the PCAB:Luc control line in constant line, corresponding to the experiment presented in Figure 4.

## Supplemental Figure 8

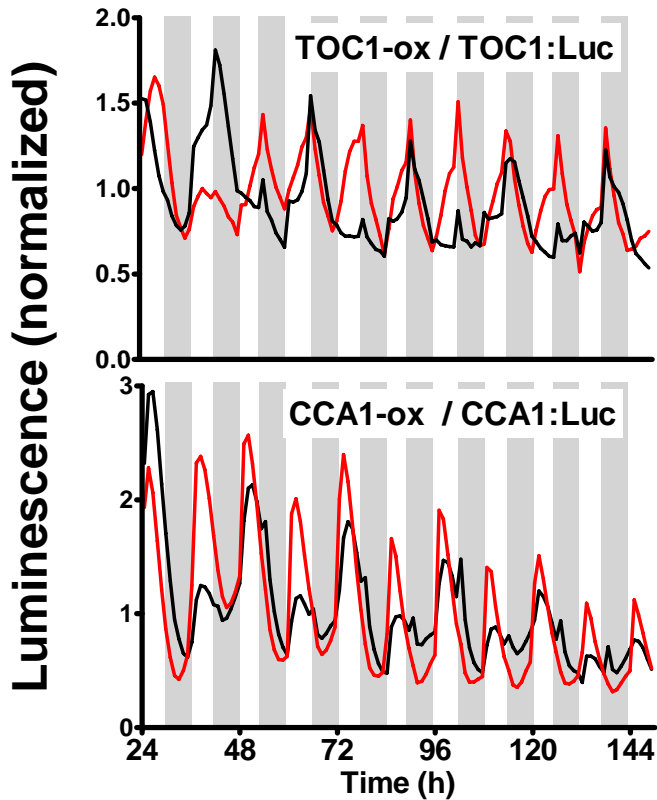

**Supplemental Figure 8. Overexpression of *TOC1* and *CCA1* disrupts circadian regulated expression of *CCA1* and *TOC1*.** Bioluminescence traces of representative *CCA1* :Luc and *TOC1*:Luc ox lines under LD: 6,6. Lines grown under constant light were transferred to new medium at the same cell density, with luciferin, from LL to LD: 6,6. Time Zero corresponds to the first lights ON. *TOC1*:Luc and *CCA1*:Luc control lines are represented in black, ox lines are plotted in red. Monitoring of luciferase is monitored from 24 hours after addition of luciferin. *TOC1*:luc and *CCA1*:luc display a biphasic 24 hour module. In contrast ox lines respond directly to each LD: 6,6 cycle. Data sets are representative at least of three trials.



# Supplemental Figure 9

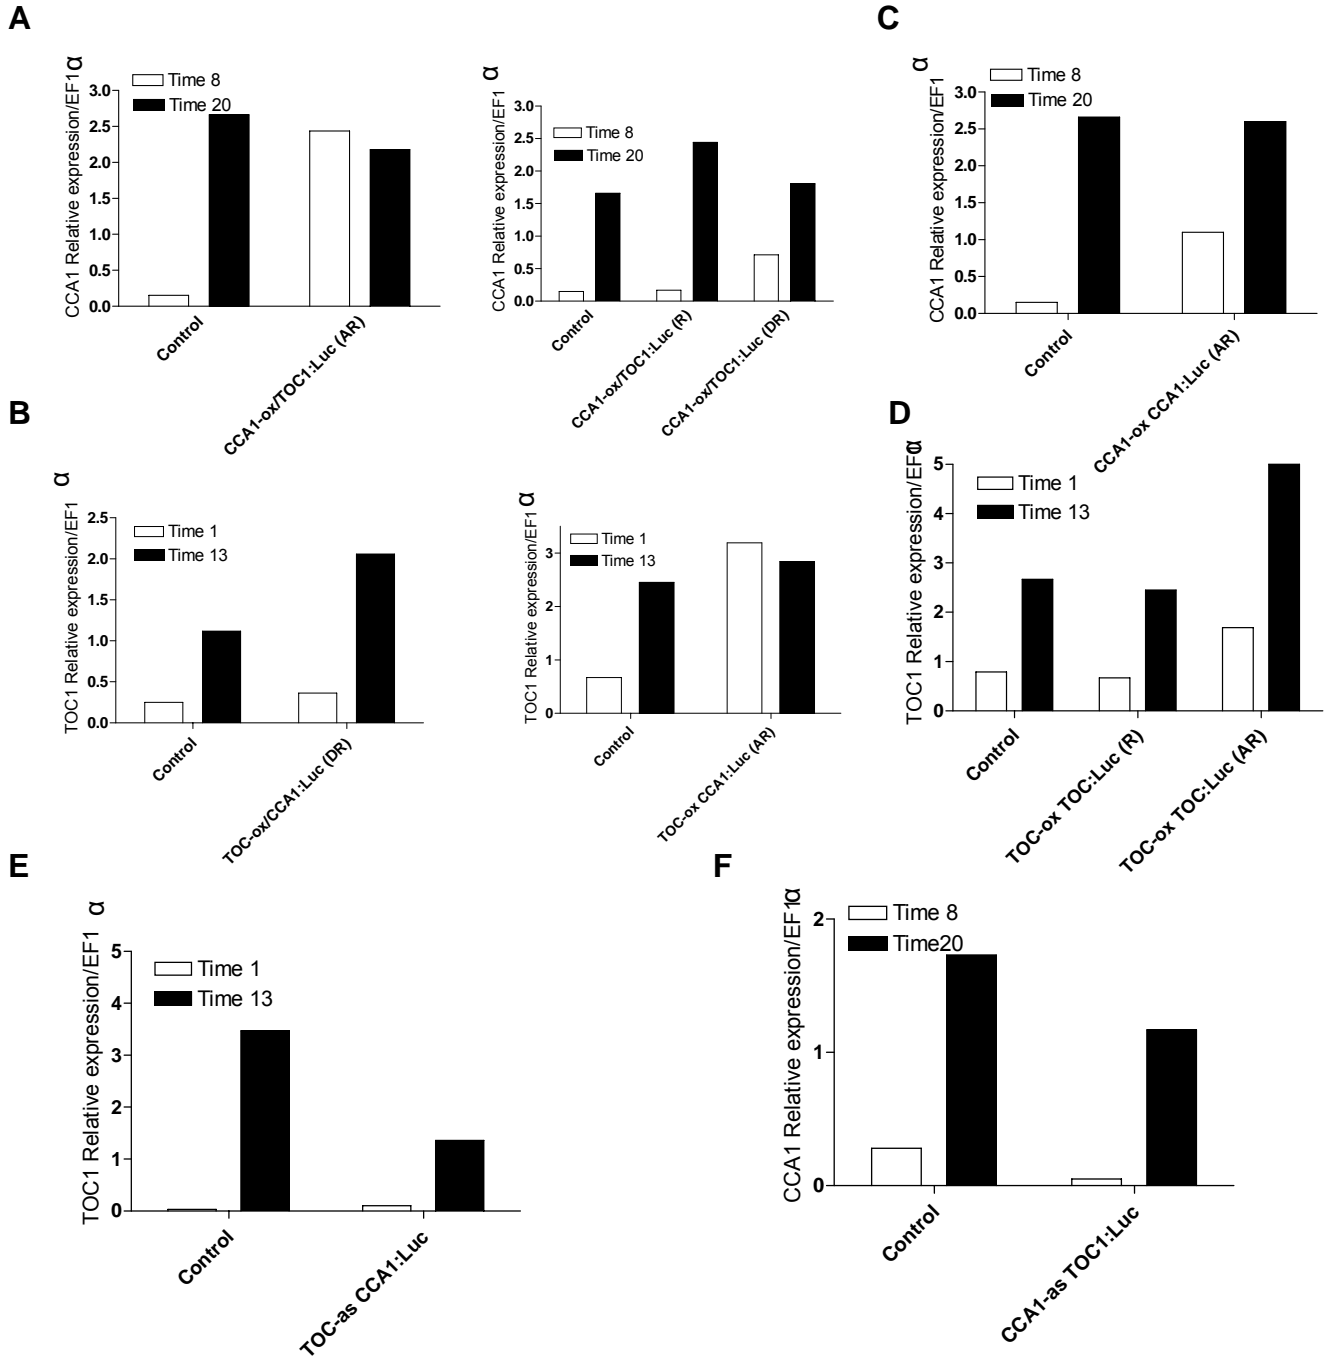

**Supplemental Figure 9. RT-PCR analysis of overexpression and antisense lines with rhythmicity defects in TOC1:Luc and CCA1:Luc backgrounds.** Transcripts were extracted at times of maximal and minimal transcript levels of *TOC1* (Time 13- Time 1) and *CCA1* (Time 20- Time 8) in controls (Light is switched on at Time 0). Transcript levels were determined in ox-lines showing varied degrees of altered rhythmicity (A-D). *TOC1* or *CCA1* transcript levels were similar between control and rhythmic lines (R) (A and D). In arrhythmic lines, the maximal and minimal levels tended to equalize, whereas intermediate levels were observed in lines with dampened rhythmicity (DR). Transcript levels were moderately reduced in TOC1-as CCA1:Luc (AR in LL) and CCA1-as lines (6:6 LD phenotype) (E and F).

### Supplemental Table 1

| family name                                        | function<br>(domains)       | <i>A. thaliana</i>                                                                                                                            | <i>O. tauri</i>               |
|----------------------------------------------------|-----------------------------|-----------------------------------------------------------------------------------------------------------------------------------------------|-------------------------------|
|                                                    |                             | “No copies”<br>(Accession)                                                                                                                    | “No copies”<br>(Accession)    |
| CCA1/LHY<br>REVEILLE                               | oscillator<br>(MYB)         | 11<br>(At2g46830, At1g01060,<br>At5g17300, At1g18330,<br>At3g10113, At5g37260,<br>At4g01280, At5g52660,<br>At3g0960, At1g01520,<br>At5g02840) | 1<br>(AY740076)               |
| PRR (TOC1, PRR3,<br>PRR5,<br>PRR7,<br>PRR9)        | oscillator<br>(REC, CCT)    | 5<br>(At5g61380, At2g46790,<br>At5g60100, At5g24470,<br>At5g02810)                                                                            | 1<br>(AY740079)               |
| Cryptochromes<br>(CRY,<br>CRY DASH)/<br>photolyase | blue light perception       | 3<br>(At4g08920, At1g04400,<br>At5g24850)                                                                                                     | 2<br>(AY740085)<br>(AY740084) |
| Phototropins                                       | blue light perception       | 2                                                                                                                                             | 1<br>(CAL58288)               |
| SRR1                                               | red light input             | 1<br>(At5g59560)                                                                                                                              | 1<br>(AY740080)               |
| Constans like<br>(CO/COL1/<br>COL2)                | light input<br>(B box, CCT) | >20<br>(At5g15840, At5g15850,<br>At3g02380, ...)                                                                                              | 1<br>(AY740087)               |

**Supplemental Table 1.** Identification of putative homologues of *Arabidopsis thaliana* clock related genes and photoreceptors in the green alga *Ostreococcus tauri*. No homologues of *ELF3*, *ELF4*, *Gigantea* and *Phytochromes* were found.

## Supplemental Table 2

| <b>Cloning primers</b>             |                                                         |                                                    |                           |                      |
|------------------------------------|---------------------------------------------------------|----------------------------------------------------|---------------------------|----------------------|
| <b>sequence amplified</b>          | <b>Forward primer</b>                                   | <b>Reverse primer</b>                              | <b>destination vector</b> | <b>cloning sites</b> |
| TOC1 (full gene)                   | TTTGCTAGCACTCGAGCGGGGCCAAAAA                            | TTTCCA TGGCGCTCGGCTCTCGAGACC                       | pOtluc                    | NheI/NcoI            |
| TOC1 (CDS)                         | GCTCTAGAA TGTCCGACGCGGAA CGCGCTC                        | CTGCA GAA CCA GAGCCTGGTCA CTTGGA GCCA TCGGGA GACGA | pOtOx                     | XbaI/BstXI           |
| TOC1 (promoter)                    | TTTGCTAGCACTCGAGCGGGGCCAAAAA                            | TTTCCA TGGCGCTCGGCTCTCGAGACC                       | pOtluc                    | NheI/NcoI            |
| CCA1 (promoter)                    | GCTAGCACGCGCGTACATCATCATC                               | CCA TGGCGCGCCGTA CCGAATCGATCCGCGCA CTCG            | pOtluc                    | NheI/NcoI            |
| CCA1 (CDS)                         | CTTAA GATGGGAGATCAA GCGGAGGCCOCCA TCGAGT                | CCA TGGTTA TTTGGTTTCA CCA CCGCCCGCTGTT             | pOtOx                     | pspOM I              |
| CCA1 (CDS)                         | CGCGGATCCA TGGGAGATCAA GCGGAGGC                         | GCTCTAGATGATTA TGGTTTCA CCA CCGGCC                 | pGex                      | EcoRI                |
| CCA1 (full gene)                   | GCTAGCACGCGCGTACATCATCATC                               | CCA TGGTTTTGGTTTCA CCA CCGCCCGCTGTTATG             | pOtluc                    | NheI/NcoI            |
| CAB (promoter)                     | AATGCTAGC GCGTCA CCGCGCTCGAGA                           | AATCCA TGGCGCGCGTCA GGTGTGC                        | pOtluc                    | NheI/NcoI            |
| HAPT (promoter)                    | TTTAGATCTAAATCTTTTCCAGGAAAAGCAG                         | CCA TGGCGAGACGGGTAAAGCGCGA                         | pOtluc                    | BglII/NcoI           |
| Histone H4 (promoter)              | GTACCGCCCGGTACCGTTGCGCTC                                | ACACGTTGAAAACAACCATGC                              | pOtluc                    | none                 |
| <b>Checking primers</b>            |                                                         |                                                    |                           |                      |
| <b>sequence amplified</b>          | <b>Forward primer</b>                                   | <b>Reverse primer</b>                              |                           |                      |
| NAT1 (internal sequence)           | ACTGGATGGGTCTTCAACC                                     | CTCTACATGACGATGCCCTG                               |                           |                      |
| KanMx i(internal sequence)         | GGTCTGCGATTCGACTCGTCC                                   | GCCCGATGCGCCAGAGTTGT                               |                           |                      |
| <b>Quantitative RT PCR Primers</b> |                                                         |                                                    |                           |                      |
| <b>sequence amplified</b>          | <b>Forward primer</b>                                   | <b>Reverse primer</b>                              | <b>Target</b>             | <b>Efficiency</b>    |
| CCA1 (CDS)                         | CTAGTACGTCGTCGAGC                                       | CCACGAA CCGACTCAT                                  | CCA1-ox lines             | 2.01                 |
| CCA1 (3' UTR)                      | TCTTCGATGGGCGATACTT                                     | TCTTCGATGGGCGATACTT                                | CCA1-as lines             | 1.81                 |
| TOC1 (CDS)                         | GGCTGACGCTGCA GCT                                       | CTGCGTTAGATCTAGGC                                  | TOC1-ox lines             | 2.01                 |
| TOC1 (3' UTR)                      | GGCAGAGAGGAA CAA TACG                                   | GTGCCTAGAGGTTGAA TTCTT                             | TOC1-as lines             | 1.81                 |
| EF1 alpha (CDS)                    | GACGCGACGGTGGATCAA                                      | CGACTGCCATCGTTTTACC                                | reference gene            | 1.99                 |
| <b>EMSA probes</b>                 |                                                         |                                                    |                           |                      |
| EE <i>Ostreococcus</i>             | CCGATCAAATA TGTTTATCGTGAAAATA TCTCAAAGACGATCACTTTTCAACC |                                                    |                           |                      |
| Generic EE <i>Arabidopsis</i>      | GTCCCGTAAAAATCTCGCGTCCA                                 |                                                    |                           |                      |
| mEE <i>Ostreococcus</i>            | CCGATCAAATA TGTTTATCGTGAAAAGCTTTCAAAGACGATCACTTTTCAACC  |                                                    |                           |                      |

**Supplemental Table 2.** List of oligonucleotides used for cloning, checking recombinant lines, quantitative RTPCR and EMSA. For RT-PCR, prime efficiencies are given. For EMSA, the probes and competitor were generated by annealing two complementary oligonucleotides together. Only the forward sequence is given.
